# Supplementary material for: Whole Genome Duplication and Enrichment of Metal Cation Transporters Revealed by De Novo Genome Sequencing of Extremely Halotolerant Black Yeast Hortaea werneckii
Source: PLoS One. 2013 Aug 15;8(8):e71328. doi: 10.1371/journal.pone.0071328 (PMC3744574; doi:10.1371/journal.pone.0071328)
Supplement: Table S1 — Number of proteins of Hortaea werneckii with a specific PFAM domains. (XLS) [file pone.0071328.s002.xls]

## Sheet: PFAM
PFAM	Number of Proteins in Hortaea werneckii	Number of Proteins in Mycosphaerella graminicola	Number of Proteins in Saccharomyces cerevisiae	Short Description
PF00400.27	695	374	285	WD40
PF07690.11	374	191	44	MFS_1
PF00069.20	245	140	121	Pkinase
PF00106.20	239	117	13	adh_short
PF00153.22	222	115	100	Mito_carr
PF00083.19	217	73	37	Sugar_tr
PF04082.13	167	77	27	Fungal_trans
PF00271.26	158	75	79	Helicase_C
PF00172.13	148	96	52	Zn_clus
PF00076.17	146	76	65	RRM_1
PF00067.17	130	81	3	p450
PF00005.22	120	68	52	ABC_tran
PF12796.2	114	48	18	Ank_2
PF00270.24	113	47	60	DEAD
PF00004.24	102	54	39	AAA
PF12697.2	96	50	5	Abhydrolase_6
PF08240.7	89	53	16	ADH_N
PF00501.23	89	68	13	AMP-binding
PF00107.21	86	58	17	ADH_zinc_N
PF01494.14	70	34	2	FAD_binding_3
PF14295.1	68	13	0	PAN_4
PF13414.1	68	33	27	TPR_11
PF00248.16	67	23	16	Aldo_ket_red
PF08238.7	66	36	27	Sel1
PF11951.3	64	27	5	Fungal_trans_2
PF00732.14	59	22	0	GMC_oxred_N
PF00176.18	57	27	17	SNF2_N
PF01266.19	55	18	3	DAO
PF00071.17	54	26	25	Ras
PF00226.26	54	27	21	DnaJ
PF00664.18	54	35	17	ABC_membrane
PF13520.1	53	20	5	AA_permease_2
PF00583.19	53	24	11	Acetyltransf_1
PF13465.1	52	30	23	zf-H2C2_2
PF05199.8	51	20	0	GMC_oxred_C
PF12937.2	50	17	6	F-box-like
PF00171.17	50	21	10	Aldedh
PF00179.21	50	26	14	UQ_con
PF01490.13	49	12	7	Aa_trans
PF00135.23	48	21	0	COesterase
PF02518.21	48	23	6	HATPase_c
PF01425.16	46	19	3	Amidase
PF00651.26	46	25	2	BTB
PF04616.9	45	10	0	Glyco_hydro_43
PF00149.23	44	26	21	Metallophos
PF13561.1	43	22	4	adh_short_C2
PF00072.19	43	23	4	Response_reg
PF07859.8	43	25	1	Abhydrolase_3
PF00013.24	42	21	15	KH_1
PF00443.24	41	13	17	UCH
PF00173.23	41	24	6	Cyt-b5
PF00150.13	40	10	4	Cellulase
PF01370.16	40	14	6	Epimerase
PF00227.21	40	16	14	Proteasome
PF01565.18	40	18	4	FAD_binding_4
PF00856.23	40	19	8	SET
PF01485.16	39	21	4	IBR
PF06985.6	39	37	0	HET
PF00550.20	38	40	2	PP-binding
PF00018.23	37	17	25	SH3_1
PF00085.15	36	15	12	Thioredoxin
PF00515.23	36	18	10	TPR_1
PF00512.20	36	20	1	HisKA
PF00118.19	35	11	11	Cpn60_TCP1
PF00009.22	35	16	17	GTP_EFTU
PF01055.21	33	7	1	Glyco_hydro_31
PF00012.15	33	12	14	HSP70
PF00933.16	33	16	0	Glyco_hydro_3
PF00155.16	33	17	12	Aminotran_1_2
PF01328.12	33	18	0	Peroxidase_2
PF00022.14	32	12	12	Actin
PF01915.17	32	14	0	Glyco_hydro_3_C
PF07992.9	32	15	11	Pyr_redox_2
PF13923.1	32	16	8	zf-C3HC4_2
PF12396.3	32	16	0	DUF3659
PF13489.1	32	19	3	Methyltransf_23
PF03663.9	31	7	2	Glyco_hydro_76
PF01602.15	31	8	8	Adaptin_N
PF07731.9	31	8	3	Cu-oxidase_2
PF00514.18	31	9	16	Arm
PF00300.17	31	15	12	His_Phos_1
PF01423.17	31	16	16	LSM
PF00168.25	31	17	21	C2
PF13639.1	31	26	9	zf-RING_2
PF07732.10	30	8	3	Cu-oxidase_3
PF00628.24	30	13	13	PHD
PF05368.8	30	15	0	NmrA
PF13417.1	30	20	1	GST_N_3
PF00160.16	29	12	9	Pro_isomerase
PF13419.1	29	14	10	HAD_2
PF00324.16	29	16	20	AA_permease
PF00122.15	29	17	16	E1-E2_ATPase
PF04193.9	29	17	10	PQ-loop
PF00857.15	28	9	1	Isochorismatase
PF00169.24	28	10	18	PH
PF01239.17	28	10	10	PPTA
PF01408.17	28	11	2	GFO_IDH_MocA
PF13738.1	28	25	0	Pyr_redox_3
PF00098.18	27	3	14	zf-CCHC
PF02133.10	27	8	10	Transp_cyt_pur
PF02770.14	27	15	1	Acyl-CoA_dh_M
PF00293.23	27	15	7	NUDIX
PF01061.19	27	18	19	ABC2_membrane
PF08241.7	27	18	4	Methyltransf_11
PF05730.6	26	7	1	CFEM
PF00394.17	26	8	3	Cu-oxidase
PF01822.14	26	8	3	WSC
PF00070.22	26	11	10	Pyr_redox
PF13086.1	26	11	6	AAA_11
PF14310.1	26	12	0	Fn3-like
PF00566.13	26	12	10	RabGAP-TBC
PF00441.19	26	14	0	Acyl-CoA_dh_1
PF01399.22	26	14	8	PCI
PF01699.19	26	14	8	Na_Ca_ex
PF00806.14	26	18	31	PUF
PF01544.13	25	9	6	CorA
PF00291.20	25	11	7	PALP
PF14259.1	25	13	17	RRM_6
PF03144.20	25	13	14	GTP_EFTU_D2
PF04828.9	25	15	0	GFA
PF00295.12	24	2	1	Glyco_hydro_28
PF00027.24	24	7	5	cNMP_binding
PF13087.1	24	12	5	AAA_12
PF00787.19	24	13	14	PX
PF00026.18	24	23	9	Asp
PF13499.1	23	10	10	EF_hand_5
PF00350.18	23	11	4	Dynamin_N
PF00557.19	23	11	7	Peptidase_M24
PF07719.12	23	15	6	TPR_2
PF01636.18	23	33	1	APH
PF14269.1	22	7	0	Arylsulfotran_2
PF02535.17	22	7	5	Zip
PF00025.16	22	8	7	Arf
PF00795.17	22	9	5	CN_hydrolase
PF01734.17	22	10	4	Patatin
PF00722.16	22	10	3	Glyco_hydro_16
PF00753.22	22	10	4	Lactamase_B
PF04408.18	22	10	7	HA2
PF00637.15	22	10	9	Clathrin
PF00225.18	22	12	7	Kinesin
PF00397.21	22	12	8	WW
PF02771.11	22	13	0	Acyl-CoA_dh_N
PF00702.21	22	13	10	Hydrolase
PF00128.19	22	13	9	Alpha-amylase
PF02826.14	22	14	6	2-Hacid_dh_C
PF01070.13	22	14	1	FMN_dh
PF00890.19	21	4	4	FAD_binding_2
PF03198.9	21	7	5	Glyco_hydro_72
PF01532.15	21	8	3	Glyco_hydro_47
PF03810.14	21	9	8	IBN_N
PF00117.23	21	9	9	GATase
PF13450.1	21	9	1	NAD_binding_8
PF00230.15	21	10	4	MIP
PF00439.20	21	10	16	Bromodomain
PF00575.18	21	10	6	S1
PF00266.14	21	11	4	Aminotran_5
PF00175.16	21	11	8	NAD_binding_1
PF00170.16	21	12	12	bZIP_1
PF00450.17	21	13	3	Peptidase_S10
PF08022.7	21	15	8	FAD_binding_8
PF01794.14	21	17	9	Ferric_reduct
PF00646.28	21	18	3	F-box
PF13193.1	21	20	3	DUF4009
PF00249.26	20	6	9	Myb_DNA-binding
PF00735.13	20	8	8	Septin
PF00899.16	20	9	9	ThiF
PF00180.15	20	9	7	Iso_dh
PF07728.9	20	10	9	AAA_5
PF00328.17	20	11	6	His_Phos_2
PF07883.6	20	13	0	Cupin_2
PF00096.21	20	14	22	zf-C2H2
PF02178.14	19	0	1	AT_hook
PF00701.17	19	3	0	DHDPS
PF02463.14	19	6	5	SMC_N
PF01398.16	19	7	3	JAB
PF00620.22	19	7	11	RhoGAP
PF05721.8	19	7	1	PhyH
PF00152.15	19	7	6	tRNA-synt_2
PF01546.23	19	7	3	Peptidase_M20
PF00481.16	19	7	7	PP2C
PF04909.9	19	8	0	Amidohydro_2
PF00627.26	19	8	10	UBA
PF13460.1	19	9	3	NAD_binding_10
PF01926.18	19	10	13	MMR_HSR1
PF00378.15	19	16	3	ECH
PF13472.1	18	4	0	Lipase_GDSL_2
PF03105.14	18	6	13	SPX
PF00493.18	18	6	6	MCM
PF00125.19	18	7	10	Histone
PF07519.6	18	7	0	Tannase
PF00289.17	18	8	9	CPSase_L_chain
PF00454.22	18	8	9	PI3_PI4_kinase
PF02786.12	18	8	9	CPSase_L_D2
PF13516.1	18	9	3	LRR_6
PF04479.8	18	11	4	RTA1
PF08030.7	18	14	8	NAD_binding_6
PF03171.15	18	14	0	2OG-FeII_Oxy
PF05729.7	18	15	0	NACHT
PF00082.17	18	16	4	Peptidase_S8
PF05001.8	18	16	16	RNA_pol_Rpb1_R
PF00199.14	17	5	2	Catalase
PF13410.1	17	6	3	GST_C_2
PF01083.17	17	6	0	Cutinase
PF12738.2	17	7	1	PTCB-BRCT
PF02714.10	17	7	4	DUF221
PF00364.17	17	8	8	Biotin_lipoyl
PF00389.25	17	9	4	2-Hacid_dh
PF12799.2	17	9	4	LRR_4
PF05739.14	17	9	10	SNARE
PF00202.16	17	10	4	Aminotran_3
PF04389.12	17	10	5	Peptidase_M28
PF00561.15	17	11	11	Abhydrolase_1
PF01593.19	17	12	1	Amino_oxidase
PF05970.9	16	2	3	PIF1
PF08546.6	16	4	5	ApbA_C
PF13634.1	16	4	13	Nucleoporin_FG
PF08450.7	16	5	1	SGL
PF12695.2	16	5	2	Abhydrolase_5
PF00884.18	16	5	0	Sulfatase
PF01585.18	16	5	4	G-patch
PF00385.19	16	6	3	Chromo
PF00636.21	16	6	3	Ribonuclease_3
PF06687.7	16	7	10	SUR7
PF13812.1	16	7	0	PPR_3
PF00498.21	16	8	16	FHA
PF00134.18	16	8	15	Cyclin_N
PF12710.2	16	8	8	HAD
PF05193.16	16	8	10	Peptidase_M16_C
PF00320.22	16	9	10	GATA
PF00581.15	16	9	10	Rhodanese
PF02469.17	16	9	2	Fasciclin
PF13426.1	16	10	0	PAS_9
PF00264.15	16	13	0	Tyrosinase
PF00132.19	16	14	5	Hexapep
PF13894.1	16	14	13	zf-C2H2_4
PF00043.20	16	14	6	GST_C
PF00668.15	16	26	0	Condensation
PF00909.16	15	4	3	Ammonium_transp
PF04130.8	15	6	2	Spc97_Spc98
PF00587.20	15	6	8	tRNA-synt_2b
PF01053.15	15	6	8	Cys_Met_Meta_PP
PF08031.7	15	7	0	BBE
PF03357.16	15	7	7	Snf7
PF00487.19	15	7	1	FA_desaturase
PF13967.1	15	7	4	RSN1_TM
PF03446.10	15	7	2	NAD_binding_2
PF00403.21	15	7	4	HMA
PF01545.16	15	7	6	Cation_efflux
PF00999.16	15	8	3	Na_H_Exchanger
PF00258.20	15	8	4	Flavodoxin_1
PF00412.17	15	8	8	LIM
PF01184.14	15	8	3	Grp1_Fun34_YaaH
PF03169.10	15	9	3	OPT
PF00642.19	15	9	7	zf-CCCH
PF00383.17	15	9	6	dCMP_cyt_deam_1
PF01738.13	15	9	2	DLH
PF00023.25	15	9	4	Ank
PF07717.11	15	9	7	OB_NTP_bind
PF00010.21	15	11	6	HLH
PF03061.17	15	11	1	4HBT
PF00571.23	15	14	13	CBS
PF13364.1	14	2	0	BetaGal_dom4_5
PF09362.5	14	3	0	DUF1996
PF00775.16	14	3	0	Dioxygenase_C
PF00615.14	14	4	2	RGS
PF13621.1	14	4	0	Cupin_8
PF01979.15	14	4	3	Amidohydro_1
PF09423.5	14	4	0	PhoD
PF00063.16	14	5	5	Myosin_head
PF04117.7	14	5	2	Mpv17_PMP22
PF00063.16	14	5	5	Myosin_head
PF02558.11	14	5	2	ApbA
PF03114.13	14	5	2	BAR
PF03142.10	14	6	1	Chitin_synth_2
PF02889.11	14	6	6	Sec63
PF01557.13	14	6	1	FAA_hydrolase
PF07687.9	14	6	3	M20_dimer
PF00533.21	14	6	12	BRCT
PF01237.13	14	6	7	Oxysterol_BP
PF00534.15	14	6	4	Glycos_transf_1
PF13921.1	14	6	7	Myb_DNA-bind_6
PF13532.1	14	6	0	2OG-FeII_Oxy_2
PF00632.20	14	7	5	HECT
PF07993.7	14	8	1	NAD_binding_4
PF00282.14	14	8	2	Pyridoxal_deC
PF10294.4	14	8	4	Methyltransf_16
PF13646.1	14	8	6	HEAT_2
PF00689.16	14	8	5	Cation_ATPase_C
PF00156.22	14	8	11	Pribosyltran
PF00690.21	14	9	7	Cation_ATPase_N
PF14226.1	14	10	0	DIOX_N
PF00782.15	14	10	6	DSPc
PF03372.18	14	10	11	Exo_endo_phos
PF13147.1	13	1	1	Amidohydro_4
PF00734.13	13	0	0	CBM_1
PF00399.14	13	1	35	PIR
PF06912.6	13	2	0	DUF1275
PF01261.19	13	3	1	AP_endonuc_2
PF00006.20	13	4	4	ATP-synt_ab
PF13242.1	13	4	2	Hydrolase_like
PF03595.12	13	5	1	C4dic_mal_tran
PF00867.13	13	5	6	XPG_I
PF06011.7	13	5	4	TRP
PF00916.15	13	5	4	Sulfate_transp
PF00565.12	13	5	1	SNase
PF00505.14	13	5	9	HMG_box
PF11913.3	13	6	0	DUF3431
PF01529.15	13	6	7	zf-DHHC
PF01569.16	13	6	7	PAP2
PF02836.12	13	6	0	Glyco_hydro_2_C
PF00191.15	13	6	0	Annexin
PF00667.15	13	6	3	FAD_binding_1
PF00929.19	13	7	5	RNase_T
PF01501.15	13	7	2	Glyco_transf_8
PF02803.13	13	7	2	Thiolase_C
PF01336.20	13	8	8	tRNA_anti
PF00703.16	13	8	0	Glyco_hydro_2
PF00724.15	13	10	2	Oxidored_FMN
PF11807.3	13	34	0	DUF3328
PF00406.17	12	2	3	ADK
PF04998.12	12	3	3	RNA_pol_Rpb1_5
PF08501.6	12	3	1	Shikimate_dh_N
PF01488.15	12	3	1	Shikimate_DH
PF06966.7	12	4	0	DUF1295
PF00888.17	12	4	4	Cullin
PF02874.18	12	4	4	ATP-synt_ab_N
PF00306.22	12	4	4	ATP-synt_ab_C
PF13415.1	12	4	3	Kelch_3
PF03441.9	12	4	1	FAD_binding_7
PF00621.15	12	5	4	RhoGEF
PF02171.12	12	5	0	Piwi
PF12706.2	12	5	3	Lactamase_B_2
PF12763.2	12	5	6	efhand_3
PF13855.1	12	5	4	LRR_8
PF01066.16	12	5	5	CDP-OH_P_transf
PF02854.14	12	6	8	MIF4G
PF05192.13	12	6	6	MutS_III
PF01217.15	12	6	6	Clat_adaptor_s
PF02656.10	12	6	4	DUF202
PF01522.16	12	6	2	Polysacc_deac_1
PF09994.4	12	6	1	DUF2235
PF00520.26	12	6	4	Ion_trans
PF01042.16	12	6	3	Ribonuc_L-PSP
PF01138.16	12	6	6	RNase_PH
PF00970.19	12	6	6	FAD_binding_6
PF00808.18	12	6	5	CBFD_NFYB_HMF
PF01031.15	12	6	2	Dynamin_M
PF02668.11	12	7	2	TauD
PF00137.16	12	8	7	ATP-synt_C
PF00307.26	12	8	7	CH
PF00330.15	12	8	5	Aconitase
PF04488.10	12	9	4	Gly_transf_sug
PF03151.11	12	9	3	TPT
PF01757.17	12	12	0	Acyl_transf_3
PF00240.18	12	14	14	ubiquitin
PF08592.6	11	2	0	DUF1772
PF00569.12	11	3	2	ZZ
PF13802.1	11	3	1	Gal_mutarotas_2
PF01179.15	11	3	0	Cu_amine_oxid
PF11790.3	11	4	0	Glyco_hydro_cc
PF01717.13	11	4	1	Meth_synt_2
PF03637.12	11	4	2	Mob1_phocein
PF00995.18	11	4	4	Sec1
PF00920.16	11	4	1	ILVD_EDD
PF01145.20	11	5	2	Band_7
PF01363.16	11	5	5	FYVE
PF00679.19	11	5	7	EFG_C
PF00694.14	11	5	4	Aconitase_C
PF00288.21	11	5	6	GHMP_kinases_N
PF01207.12	11	5	5	Dus
PF11885.3	11	5	0	DUF3405
PF01068.16	11	5	2	DNA_ligase_A_M
PF00488.16	11	6	6	MutS_V
PF00108.18	11	6	2	Thiolase_N
PF13418.1	11	6	4	Kelch_4
PF00141.18	11	6	1	peroxidase
PF02146.12	11	6	5	SIR2
PF02466.14	11	6	3	Tim17
PF10584.4	11	7	7	Proteasome_A_N
PF01554.13	11	7	4	MatE
PF06422.7	11	7	9	PDR_CDR
PF02837.13	11	7	0	Glyco_hydro_2_N
PF00704.23	11	9	1	Glyco_hydro_18
PF00144.19	11	10	0	Beta-lactamase
PF03060.10	11	10	1	NMO
PF02852.17	10	1	3	Pyr_redox_dim
PF02386.11	10	1	2	TrkH
PF02990.11	10	1	3	EMP70
PF00840.15	10	1	0	Glyco_hydro_7
PF02037.22	10	2	5	SAP
PF12296.3	10	2	0	HsbA
PF00544.14	10	2	0	Pec_lyase_C
PF01384.15	10	2	1	PHO4
PF00331.15	10	2	0	Glyco_hydro_10
PF13632.1	10	2	0	Glyco_trans_2_3
PF02666.10	10	3	2	PS_Dcarbxylase
PF02894.12	10	3	1	GFO_IDH_MocA_C
PF01284.18	10	3	4	MARVEL
PF02733.12	10	3	2	Dak1
PF05195.11	10	3	2	AMP_N
PF12223.3	10	3	3	DUF3602
PF13409.1	10	3	3	GST_N_2
PF00080.15	10	3	2	Sod_Cu
PF00749.16	10	3	3	tRNA-synt_1c
PF03129.15	10	4	6	HGTP_anticodon
PF01556.13	10	4	6	DnaJ_C
PF01369.15	10	4	5	Sec7
PF12621.3	10	4	2	DUF3779
PF00617.14	10	4	4	RasGEF
PF01846.14	10	4	5	FF
PF04969.11	10	4	1	CS
PF01740.16	10	4	3	STAS
PF00254.23	10	4	4	FKBP_C
PF13424.1	10	4	0	TPR_12
PF02785.14	10	4	5	Biotin_carb_C
PF05653.9	10	4	0	Mg_trans_NIPA
PF03031.13	10	4	5	NIF
PF10281.4	10	4	4	Ish1
PF00459.20	10	4	3	Inositol_P
PF00382.14	10	4	4	TFIIB
PF05188.12	10	5	5	MutS_II
PF03901.12	10	5	4	Glyco_transf_22
PF03143.12	10	5	4	GTP_EFTU_D3
PF03476.11	10	5	0	MOSC_N
PF03473.12	10	5	0	MOSC
PF01008.12	10	5	4	IF-2B
PF03062.14	10	5	5	MBOAT
PF00133.17	10	5	7	tRNA-synt_1
PF00650.15	10	5	6	CRAL_TRIO
PF01679.12	10	5	4	Pmp3
PF01412.13	10	5	6	ArfGap
PF00206.15	10	5	3	Lyase_1
PF03109.11	10	5	3	ABC1
PF04427.13	10	5	6	Brix
PF00579.20	10	5	5	tRNA-synt_1b
PF13589.1	10	5	3	HATPase_c_3
PF00294.19	10	6	3	PfkB
PF00388.14	10	6	1	PI-PLC-X
PF05773.17	10	6	4	RWD
PF00205.17	10	6	7	TPP_enzyme_M
PF00250.13	10	6	4	Fork_head
PF00596.16	10	6	1	Aldolase_II
PF00415.13	10	6	6	RCC1
PF08613.6	10	7	8	Cyclin
PF04116.8	10	7	4	FA_hydroxylase
PF05637.7	10	7	2	Glyco_transf_34
PF01553.16	10	7	6	Acyltransferase
PF07971.7	10	8	0	Glyco_hydro_92
PF04055.16	10	8	4	Radical_SAM
PF06609.8	10	8	0	TRI12
PF00682.14	10	9	6	HMGL-like
PF09286.6	10	10	0	Pro-kuma_activ
PF01753.13	10	21	1	zf-MYND
PF03211.8	9	1	0	Pectate_lyase
PF01670.11	9	1	0	Glyco_hydro_12
PF01851.17	9	2	3	PC_rep
PF03403.8	9	2	0	PAF-AH_p_II
PF03972.9	9	2	1	MmgE_PrpD
PF09347.5	9	2	0	DUF1989
PF00209.13	9	2	0	SNF
PF02129.13	9	2	0	Peptidase_S15
PF07470.8	9	2	0	Glyco_hydro_88
PF01039.17	9	3	2	Carboxyl_trans
PF00198.18	9	3	2	2-oxoacid_dh
PF00687.16	9	3	5	Ribosomal_L1
PF00339.24	9	3	5	Arrestin_N
PF11927.3	9	3	0	DUF3445
PF03330.13	9	3	0	DPBB_1
PF01433.15	9	3	4	Peptidase_M1
PF00623.15	9	3	3	RNA_pol_Rpb1_2
PF02148.14	9	3	4	zf-UBP
PF02727.11	9	3	0	Cu_amine_oxidN2
PF00618.15	9	3	3	RasGEF_N
PF00578.16	9	3	4	AhpC-TSA
PF01591.13	9	3	4	6PF2K
PF01535.15	9	3	0	PPR
PF04051.11	9	3	3	TRAPP
PF02782.11	9	4	4	FGGY_C
PF13959.1	9	4	4	DUF4217
PF01624.15	9	4	4	MutS_I
PF04433.12	9	4	5	SWIRM
PF01088.16	9	4	1	Peptidase_C12
PF00285.16	9	4	3	Citrate_synt
PF04997.7	9	4	3	RNA_pol_Rpb1_1
PF00432.16	9	4	12	Prenyltrans
PF01426.13	9	4	5	BAH
PF01920.15	9	4	4	Prefoldin_2
PF00491.16	9	4	1	Arginase
PF13344.1	9	4	2	Hydrolase_6
PF03765.10	9	4	6	CRAL_TRIO_N
PF00850.14	9	4	5	Hist_deacetyl
PF00928.16	9	4	5	Adap_comp_sub
PF00875.13	9	4	1	DNA_photolyase
PF01189.12	9	4	3	Nol1_Nop2_Fmu
PF02845.11	9	4	9	CUE
PF08542.6	9	4	4	Rep_fac_C
PF04675.9	9	4	2	DNA_ligase_A_N
PF10607.4	9	4	4	CLTH
PF00091.20	9	5	5	Tubulin
PF00903.20	9	5	1	Glyoxalase
PF05190.13	9	5	4	MutS_IV
PF02515.12	9	5	0	CoA_transf_3
PF13041.1	9	5	2	PPR_2
PF00675.15	9	5	8	Peptidase_M16
PF02776.13	9	6	7	TPP_enzyme_N
PF12708.2	9	6	0	Pectate_lyase_3
PF00326.16	9	6	2	Peptidase_S9
PF00190.17	9	8	0	Cupin_1
PF06441.7	9	8	0	EHN
PF00638.13	8	1	3	Ran_BP1
PF02493.15	8	0	0	MORN
PF01975.12	8	1	1	SurE
PF01693.11	8	0	1	Cauli_VI
PF02458.10	8	1	1	Transferase
PF01400.19	8	1	0	Astacin
PF02055.11	8	1	0	Glyco_hydro_30
PF01238.16	8	2	1	PMI_typeI
PF07876.7	8	2	0	Dabb
PF13446.1	8	2	2	RPT
PF06628.7	8	2	2	Catalase-rel
PF03388.8	8	2	4	Lectin_leg-like
PF08530.5	8	2	0	PepX_C
PF07217.6	8	2	0	Het-C
PF13508.1	8	2	1	Acetyltransf_7
PF00793.15	8	2	2	DAHP_synth_1
PF03443.9	8	2	0	Glyco_hydro_61
PF00456.16	8	2	2	Transketolase_N
PF06068.8	8	2	2	TIP49
PF01116.15	8	2	1	F_bP_aldolase
PF01265.12	8	2	2	Cyto_heme_lyase
PF13515.1	8	3	2	FUSC_2
PF08740.6	8	3	1	BCS1_N
PF05378.8	8	3	1	Hydant_A_N
PF01968.13	8	3	1	Hydantoinase_A
PF01409.15	8	3	3	tRNA-synt_2d
PF01805.15	8	3	2	Surp
PF12825.2	8	3	1	DUF3818
PF13793.1	8	3	5	Pribosyltran_N
PF00676.15	8	3	2	E1_dh
PF01966.17	8	3	2	HD
PF03452.9	8	3	3	Anp1
PF13378.1	8	3	0	MR_MLE_C
PF02953.10	8	3	5	zf-Tim10_DDP
PF08544.8	8	3	3	GHMP_kinases_C
PF02769.17	8	3	3	AIRS_C
PF00244.15	8	3	2	14-3-3
PF01302.20	8	3	4	CAP_GLY
PF01793.11	8	3	9	Glyco_transf_15
PF00241.15	8	3	5	Cofilin_ADF
PF00318.15	8	3	5	Ribosomal_S2
PF09325.5	8	3	3	Vps5
PF10282.4	8	3	0	Lactonase
PF03727.11	8	3	4	Hexokinase_2
PF02734.12	8	3	2	Dak2
PF03328.9	8	3	0	HpcH_HpaI
PF03828.14	8	3	2	PAP_assoc
PF03798.11	8	3	4	TRAM_LAG1_CLN8
PF08477.8	8	3	2	Miro
PF02190.11	8	3	1	LON
PF00036.27	8	3	1	efhand
PF13893.1	8	3	6	RRM_5
PF06964.7	8	3	0	Alpha-L-AF_C
PF08407.6	8	3	2	Chitin_synth_1N
PF01263.15	8	3	4	Aldose_epim
PF01663.17	8	3	5	Phosphodiest
PF00365.15	8	3	4	PFK
PF08766.6	8	3	2	DEK_C
PF00535.21	8	3	2	Glycos_transf_2
PF00370.16	8	4	5	FGGY_N
PF02383.13	8	4	5	Syja_N
PF02752.17	8	4	8	Arrestin_C
PF02134.16	8	4	4	UBACT
PF03033.15	8	4	1	Glyco_transf_28
PF13641.1	8	4	0	Glyco_tranf_2_3
PF08760.6	8	4	0	DUF1793
PF01479.20	8	4	6	S4
PF00352.16	8	4	2	TBP
PF00136.16	8	4	4	DNA_pol_B
PF08699.5	8	4	0	DUF1785
PF00654.15	8	4	1	Voltage_CLC
PF02798.15	8	4	4	GST_N
PF08264.8	8	4	4	Anticodon_1
PF00891.13	8	4	0	Methyltransf_2
PF00503.15	8	4	2	G-alpha
PF00046.24	8	4	7	Homeobox
PF00075.19	8	4	1	RNase_H
PF00789.15	8	4	7	UBX
PF01156.14	8	4	1	IU_nuc_hydro
PF08534.5	8	4	1	Redoxin
PF01853.13	8	4	3	MOZ_SAS
PF01105.19	8	4	9	EMP24_GP25L
PF08700.6	8	4	2	Vps51
PF00790.14	8	4	4	VHS
PF00962.17	8	4	4	A_deaminase
PF03055.10	8	4	0	RPE65
PF05916.6	8	4	4	Sld5
PF00672.20	8	4	0	HAMP
PF13622.1	8	5	0	4HBT_3
PF11754.3	8	5	0	Velvet
PF01063.14	8	5	3	Aminotran_4
PF00462.19	8	5	8	Glutaredoxin
PF03104.14	8	5	5	DNA_pol_B_exo1
PF03098.10	8	5	0	An_peroxidase
PF00817.15	8	5	2	IMS
PF11799.3	8	5	2	IMS_C
PF00730.20	8	5	4	HhH-GPD
PF03953.12	8	5	4	Tubulin_C
PF02779.19	8	5	4	Transket_pyr
PF03009.12	8	5	2	GDPD
PF02775.16	8	6	7	TPP_enzyme_C
PF01124.13	8	6	0	MAPEG
PF12874.2	8	6	3	zf-met
PF00698.16	8	13	1	Acyl_transf_1
PF05577.7	8	13	0	Peptidase_S28
PF00109.21	8	15	2	ketoacyl-synt
PF01432.15	8	16	2	Peptidase_M3
PF08881.5	7	0	0	CVNH
PF02985.17	7	1	2	HEAT
PF00457.12	7	1	0	Glyco_hydro_11
PF01301.14	7	1	0	Glyco_hydro_35
PF10435.4	7	1	0	BetaGal_dom2
PF13363.1	7	1	0	BetaGal_dom3
PF10355.4	7	1	2	Ytp1
PF03159.13	7	0	2	XRN_N
PF09792.4	7	1	0	But2
PF13594.1	7	0	0	Amidohydro_5
PF10348.4	7	1	1	DUF2427
PF00728.17	7	1	0	Glyco_hydro_20
PF01095.14	7	1	0	Pectinesterase
PF00145.12	7	1	0	DNA_methylase
PF07970.7	7	2	2	COPIIcoated_ERV
PF02538.9	7	2	1	Hydantoinase_B
PF05277.7	7	2	1	DUF726
PF00733.16	7	2	3	Asn_synthase
PF04851.10	7	2	3	ResIII
PF00425.13	7	2	2	Chorismate_bind
PF13348.1	7	2	0	Y_phosphatase3C
PF01648.15	7	2	3	ACPS
PF00474.12	7	2	1	SSF
PF04950.7	7	2	2	DUF663
PF00657.17	7	2	1	Lipase_GDSL
PF02194.10	7	2	2	PXA
PF00572.13	7	2	3	Ribosomal_L13
PF03583.9	7	2	0	LIP
PF03221.11	7	2	1	HTH_Tnp_Tc5
PF08719.6	7	2	0	DUF1768
PF00773.14	7	2	3	RNB
PF00310.16	7	2	4	GATase_2
PF01459.17	7	2	3	Porin_3
PF03992.11	7	2	0	ABM
PF00237.14	7	2	3	Ribosomal_L22
PF01201.17	7	2	3	Ribosomal_S8e
PF07885.11	7	2	2	Ion_trans_2
PF13857.1	7	3	2	Ank_5
PF02824.16	7	3	3	TGS
PF07973.9	7	3	3	tRNA_SAD
PF01428.11	7	3	2	zf-AN1
PF04191.8	7	3	3	PEMT
PF01764.20	7	3	2	Lipase_3
PF02366.13	7	3	6	PMT
PF04983.13	7	3	3	RNA_pol_Rpb1_3
PF00994.19	7	3	1	MoCF_biosynth
PF04561.9	7	3	3	RNA_pol_Rpb2_2
PF04042.11	7	3	3	DNA_pol_E_B
PF02136.15	7	3	2	NTF2
PF13792.1	7	3	3	Sulfate_tra_GLY
PF02883.15	7	3	4	Alpha_adaptinC2
PF00755.15	7	3	4	Carn_acyltransf
PF01253.17	7	3	3	SUI1
PF01119.14	7	3	3	DNA_mis_repair
PF01118.19	7	3	2	Semialdhyde_dh
PF12698.2	7	3	0	ABC2_membrane_3
PF01073.14	7	3	1	3Beta_HSD
PF02185.11	7	3	2	HR1
PF00610.16	7	3	5	DEP
PF01487.10	7	3	1	DHquinase_I
PF02259.18	7	3	4	FAT
PF08389.7	7	3	3	Xpo1
PF00560.28	7	3	2	LRR_1
PF01231.13	7	3	1	IDO
PF10436.4	7	3	2	BCDHK_Adom3
PF04679.10	7	3	1	DNA_ligase_A_C
PF04444.9	7	3	0	Dioxygenase_N
PF08513.6	7	3	5	LisH
PF00982.16	7	3	4	Glyco_transf_20
PF03914.12	7	3	3	CBF
PF04383.8	7	3	4	KilA-N
PF13637.1	7	4	3	Ank_4
PF13540.1	7	4	4	RCC1_2
PF13191.1	7	4	0	AAA_16
PF01694.17	7	4	2	Rhomboid
PF00465.14	7	4	1	Fe-ADH
PF00752.12	7	4	5	XPG_N
PF02260.15	7	4	5	FATC
PF02878.11	7	4	4	PGM_PMM_I
PF00957.16	7	4	5	Synaptobrevin
PF01909.18	7	4	3	NTP_transf_2
PF05347.10	7	4	3	Complex1_LYR
PF06470.8	7	4	4	SMC_hinge
PF00551.14	7	4	2	Formyl_trans_N
PF03188.11	7	4	0	Cytochrom_B561
PF04199.8	7	4	0	Cyclase
PF00686.14	7	4	0	CBM_20
PF01728.14	7	5	3	FtsJ
PF08447.6	7	5	0	PAS_3
PF00246.19	7	5	1	Peptidase_M14
PF01612.15	7	5	1	DNA_pol_A_exo1
PF01248.21	7	5	6	Ribosomal_L7Ae
PF01243.15	7	5	3	Pyridox_oxidase
PF02492.14	7	5	1	cobW
PF05057.9	7	5	4	DUF676
PF13302.1	7	5	1	Acetyltransf_3
PF00626.17	7	5	4	Gelsolin
PF00892.15	7	6	5	EamA
PF08423.6	6	1	3	Rad51
PF00756.15	6	1	1	Esterase
PF01226.12	6	1	1	Form_Nir_trans
PF02781.11	6	1	1	G6PD_C
PF02746.11	6	1	0	MR_MLE_N
PF07651.11	6	1	3	ANTH
PF13848.1	6	1	2	Thioredoxin_6
PF01182.15	6	1	4	Glucosamine_iso
PF09757.4	6	1	1	Arb2
PF03306.8	6	1	0	AAL_decarboxy
PF12868.2	6	0	0	DUF3824
PF09333.6	6	1	1	ATG_C
PF03571.10	6	1	1	Peptidase_M49
PF08267.7	6	1	1	Meth_synt_1
PF04525.7	6	1	0	Tub_2
PF01960.13	6	1	1	ArgJ
PF03547.13	6	1	4	Mem_trans
PF12751.2	6	1	2	Vac7
PF10337.4	6	2	1	DUF2422
PF12464.3	6	2	1	Mac
PF01987.12	6	2	1	AIM24
PF01019.16	6	2	1	G_glu_transpept
PF01842.20	6	2	1	ACT
PF14027.1	6	2	0	DUF4243
PF00988.17	6	2	2	CPSase_sm_chain
PF03935.10	6	2	2	SKN1
PF00448.17	6	2	2	SRP54
PF05495.7	6	2	1	zf-CHY
PF11838.3	6	2	3	DUF3358
PF12999.2	6	2	1	PRKCSH-like
PF02065.13	6	2	0	Melibiase
PF00463.16	6	2	2	ICL
PF13577.1	6	2	0	SnoaL_4
PF00332.13	6	2	3	Glyco_hydro_17
PF09298.6	6	2	0	DUF1969
PF12828.2	6	2	1	PXB
PF00121.13	6	2	1	TIM
PF00582.21	6	2	0	Usp
PF02755.10	6	2	0	RPEL
PF07976.7	6	2	0	Phe_hydrox_dim
PF02204.13	6	2	3	VPS9
PF13920.1	6	2	2	zf-C3HC4_3
PF06371.8	6	2	2	Drf_GBD
PF00924.13	6	2	0	MS_channel
PF00464.14	6	2	2	SHMT
PF00956.13	6	2	2	NAP
PF13350.1	6	2	0	Y_phosphatase3
PF01704.13	6	2	3	UDPGP
PF12814.2	6	2	1	Mcp5_PH
PF08711.6	6	2	2	Med26
PF13659.1	6	2	1	Methyltransf_26
PF01435.13	6	2	2	Peptidase_M48
PF05047.11	6	2	2	L51_S25_CI-B8
PF12906.2	6	2	1	RINGv
PF01014.13	6	2	0	Uricase
PF03950.13	6	2	2	tRNA-synt_1c_C
PF13434.1	6	2	0	K_oxygenase
PF01204.13	6	2	2	Trehalase
PF02170.17	6	2	0	PAZ
PF03366.11	6	2	3	YEATS
PF01036.13	6	2	3	Bac_rhodopsin
PF01112.13	6	2	0	Asparaginase_2
PF01480.12	6	2	0	PWI
PF01202.17	6	2	1	SKI
PF02787.14	6	2	2	CPSase_L_D3
PF04153.13	6	2	3	NOT2_3_5
PF05183.7	6	2	0	RdRP
PF00483.18	6	2	2	NTP_transferase
PF00612.22	6	2	2	IQ
PF05241.7	6	2	0	EBP
PF00814.20	6	2	2	Peptidase_M22
PF03836.10	6	2	1	RasGAP_C
PF01026.16	6	2	2	TatD_DNase
PF13012.1	6	3	2	MitMem_reg
PF10263.4	6	3	0	SprT-like
PF02893.15	6	3	6	GRAM
PF11815.3	6	3	3	DUF3336
PF07524.8	6	3	1	Bromo_TP
PF09949.4	6	3	1	DUF2183
PF09729.4	6	3	3	Gti1_Pac2
PF01613.13	6	3	0	Flavin_Reduct
PF00780.17	6	3	3	CNH
PF01388.16	6	3	2	ARID
PF12783.2	6	3	2	Sec7_N
PF02353.15	6	3	0	CMAS
PF10585.4	6	3	3	UBA_e1_thiolCys
PF00616.14	6	3	4	RasGAP
PF10557.4	6	3	3	Cullin_Nedd8
PF04000.10	6	3	3	Sas10_Utp3
PF02815.14	6	3	7	MIR
PF12171.3	6	3	4	zf-C2H2_jaz
PF00387.14	6	3	1	PI-PLC-Y
PF03764.13	6	3	4	EFG_IV
PF02434.11	6	3	0	Fringe
PF05000.12	6	3	3	RNA_pol_Rpb1_4
PF04563.10	6	3	3	RNA_pol_Rpb2_1
PF04565.11	6	3	3	RNA_pol_Rpb2_3
PF00562.23	6	3	3	RNA_pol_Rpb2_6
PF04560.15	6	3	3	RNA_pol_Rpb2_7
PF12848.2	6	3	2	ABC_tran_2
PF08512.7	6	3	3	Rtt106
PF05648.9	6	3	2	PEX11
PF00696.23	6	3	4	AA_kinase
PF01472.15	6	3	4	PUA
PF03928.9	6	3	1	DUF336
PF00494.14	6	3	1	SQS_PSY
PF09260.6	6	3	0	DUF1966
PF00102.22	6	3	3	Y_phosphatase
PF02879.11	6	3	4	PGM_PMM_II
PF00347.18	6	3	6	Ribosomal_L6
PF01798.13	6	3	3	Nop
PF13774.1	6	3	2	Longin
PF01467.21	6	3	6	CTP_transf_2
PF07724.9	6	3	3	AAA_2
PF00447.12	6	3	5	HSF_DNA-bind
PF01096.13	6	3	4	TFIIS_C
PF03029.12	6	3	3	ATP_bind_1
PF04757.9	6	3	3	Pex2_Pex12
PF00349.16	6	3	5	Hexokinase_1
PF07647.12	6	3	4	SAM_2
PF08325.5	6	3	1	WLM
PF01575.14	6	3	2	MaoC_dehydratas
PF00828.14	6	3	4	Ribosomal_L18e
PF00355.21	6	3	1	Rieske
PF03022.11	6	3	0	MRJP
PF01077.17	6	3	1	NIR_SIR
PF00804.20	6	3	2	Syntaxin
PF00410.14	6	3	3	Ribosomal_S8
PF12352.3	6	3	3	V-SNARE_C
PF01652.13	6	3	1	IF4E
PF13813.1	6	3	0	MBOAT_2
PF03399.11	6	3	3	SAC3_GANP
PF14377.1	6	3	1	DUF4414
PF06398.6	6	3	5	Pex24p
PF02629.14	6	3	1	CoA_binding
PF04253.10	6	3	3	TFR_dimer
PF00472.15	6	3	3	RF-1
PF14228.1	6	3	3	MOR2-PAG1_mid
PF10602.4	6	3	1	RPN7
PF02338.14	6	3	2	OTU
PF04810.10	6	3	4	zf-Sec23_Sec24
PF04811.10	6	3	5	Sec23_trunk
PF08033.7	6	3	4	Sec23_BS
PF04815.10	6	3	4	Sec23_helical
PF10609.4	6	3	2	ParA
PF02671.16	6	3	3	PAH
PF02582.9	6	3	3	DUF155
PF01230.18	6	3	3	HIT
PF03155.10	6	3	2	Alg6_Alg8
PF08550.5	6	3	4	DUF1752
PF08618.5	6	3	1	Opi1
PF13405.1	6	4	1	EF_hand_4
PF13513.1	6	4	4	HEAT_EZ
PF00614.17	6	4	2	PLDc
PF00684.14	6	4	5	DnaJ_CXXCXGXG
PF13668.1	6	4	0	Ferritin_2
PF02913.14	6	4	3	FAD-oxidase_C
PF10433.4	6	4	1	MMS1_N
PF02780.15	6	4	3	Transketolase_C
PF02373.17	6	4	3	JmjC
PF02230.11	6	4	1	Abhydrolase_2
PF00955.16	6	4	2	HCO3_cotransp
PF00188.21	6	4	3	CAP
PF03969.11	6	4	1	AFG1_ATPase
PF03404.11	6	4	0	Mo-co_dimer
PF02777.13	6	4	2	Sod_Fe_C
PF03835.10	6	4	2	Rad4
PF01416.15	6	4	6	PseudoU_synth_1
PF11700.3	6	5	1	ATG22
PF13091.1	6	5	2	PLDc_2
PF01161.15	6	5	3	PBP
PF00348.12	6	5	3	polyprenyl_synt
PF00611.18	6	5	4	FCH
PF03178.10	6	5	2	CPSF_A
PF00549.14	6	5	2	Ligase_CoA
PF10342.4	6	5	2	GPI-anchored
PF04145.10	6	5	3	Ctr
PF01323.15	6	6	0	DSBA
PF00002.19	5	1	0	7tm_2
PF02724.9	5	1	1	CDC45
PF00078.22	5	0	5	RVT_1
PF13869.1	5	1	0	NUDIX_2
PF12850.2	5	1	1	Metallophos_2
PF07819.8	5	1	2	PGAP1
PF01274.17	5	1	2	Malate_synthase
PF04652.11	5	1	2	DUF605
PF12718.2	5	1	2	Tropomyosin_1
PF11696.3	5	1	0	DUF3292
PF01293.15	5	1	1	PEPCK_ATP
PF13374.1	5	1	0	TPR_10
PF01590.21	5	1	0	GAF
PF09770.4	5	1	2	PAT1
PF07529.8	5	1	2	HSA
PF04180.9	5	1	1	LTV
PF12054.3	5	1	1	DUF3535
PF00900.15	5	1	2	Ribosomal_S4e
PF00183.13	5	1	2	HSP90
PF01391.13	5	0	0	Collagen
PF06027.7	5	1	0	DUF914
PF00781.19	5	1	2	DAGK_cat
PF10275.4	5	1	0	Peptidase_C65
PF06218.6	5	1	1	NPR2
PF01988.14	5	1	1	VIT1
PF13507.1	5	1	1	GATase_5
PF02221.10	5	1	1	E1_DerP2_DerF2
PF04825.8	5	1	2	Rad21_Rec8_N
PF04547.7	5	1	1	Anoctamin
PF03368.9	5	1	0	dsRNA_bind
PF12234.3	5	1	1	Rav1p_C
PF13950.1	5	1	1	Epimerase_Csub
PF04030.9	5	1	1	ALO
PF08580.5	5	1	2	KAR9
PF05345.7	5	0	1	He_PIG
PF00297.17	5	2	2	Ribosomal_L3
PF13850.1	5	2	2	ERGIC_N
PF00925.15	5	2	1	GTP_cyclohydro2
PF04677.10	5	2	1	CwfJ_C_1
PF07714.12	5	2	0	Pkinase_Tyr
PF00416.17	5	2	3	Ribosomal_S13
PF07956.6	5	2	1	DUF1690
PF00590.15	5	2	2	TP_methylase
PF04072.9	5	2	2	LCM
PF02207.15	5	2	2	zf-UBR
PF02182.12	5	2	0	YDG_SRA
PF02127.10	5	2	2	Peptidase_M18
PF00181.18	5	2	3	Ribosomal_L2
PF03947.13	5	2	3	Ribosomal_L2_C
PF02487.12	5	2	1	CLN3
PF04641.7	5	2	0	Rtf2
PF04900.7	5	2	2	Fcf1
PF07766.8	5	2	2	LETM1
PF13174.1	5	2	1	TPR_6
PF03561.10	5	2	2	Allantoicase
PF00586.19	5	2	2	AIRS
PF01163.17	5	2	2	RIO1
PF01012.16	5	2	2	ETF
PF08598.6	5	2	2	Sds3
PF00996.13	5	2	2	GDI
PF12273.3	5	2	2	RCR
PF04212.13	5	2	1	MIT
PF02201.13	5	2	3	SWIB
PF12239.3	5	2	1	DUF3605
PF02269.11	5	2	2	TFIID-18kDa
PF03200.11	5	2	1	Glyco_hydro_63
PF02765.12	5	2	1	Telo_bind
PF01761.15	5	2	1	DHQ_synthase
PF10391.4	5	2	0	DNA_pol_lambd_f
PF04968.7	5	2	0	CHORD
PF04715.8	5	2	2	Anth_synt_I_N
PF02403.17	5	2	1	Seryl_tRNA_N
PF11274.3	5	2	0	DUF3074
PF00644.15	5	2	0	PARP
PF05362.8	5	2	1	Lon_C
PF00786.23	5	2	4	PBD
PF06472.10	5	2	2	ABC_membrane_2
PF00653.16	5	2	2	BIR
PF04511.10	5	2	2	DER1
PF05592.6	5	2	0	Bac_rhamnosid
PF00485.13	5	2	2	PRK
PF12271.3	5	2	1	Chs3p
PF13806.1	5	2	0	Rieske_2
PF13821.1	5	2	1	DUF4187
PF00164.20	5	2	3	Ribosomal_S12
PF09334.6	5	2	2	tRNA-synt_1g
PF09336.5	5	2	1	Vps4_C
PF10186.4	5	2	1	Atg14
PF08265.6	5	2	2	YL1_C
PF00613.15	5	2	3	PI3Ka
PF03464.10	5	2	2	eRF1_2
PF06428.6	5	2	1	Sec2p
PF08506.5	5	2	1	Cse1
PF11976.3	5	2	2	Rad60-SLD
PF13844.1	5	2	0	Glyco_transf_41
PF01150.12	5	2	2	GDA1_CD39
PF03152.9	5	2	1	UFD1
PF07738.8	5	2	1	Sad1_UNC
PF02005.11	5	2	1	TRM
PF08142.7	5	2	2	AARP2CN
PF08498.5	5	2	1	Sterol_MT_C
PF10417.4	5	2	3	1-cysPrx_C
PF07989.6	5	2	0	Microtub_assoc
PF07653.12	5	3	0	SH3_2
PF01571.16	5	3	1	GCV_T
PF01504.13	5	3	2	PIP5K
PF03127.9	5	3	3	GAT
PF00201.13	5	3	1	UDPGT
PF04567.12	5	3	3	RNA_pol_Rpb2_5
PF06824.6	5	3	0	DUF1237
PF13854.1	5	3	5	Kelch_5
PF01722.13	5	3	3	BolA
PF00408.15	5	3	4	PGM_PMM_IV
PF13233.1	5	3	1	Complex1_LYR_2
PF08060.8	5	3	3	NOSIC
PF14087.1	5	3	0	DUF4267
PF01380.17	5	3	4	SIS
PF05383.12	5	3	3	La
PF00130.17	5	3	2	C1_1
PF03006.15	5	3	4	HlyIII
PF02984.14	5	3	6	Cyclin_C
PF01287.15	5	3	2	eIF-5a
PF03070.11	5	3	4	TENA_THI-4
PF08449.6	5	3	5	UAA
PF01644.12	5	3	2	Chitin_synth_1
PF00648.16	5	3	0	Peptidase_C2
PF00564.19	5	3	2	PB1
PF03909.12	5	3	3	BSD
PF03876.12	5	3	3	SHS2_Rpb7-N
PF02544.11	5	3	2	Steroid_dh
PF04003.7	5	3	3	Utp12
PF10431.4	5	3	3	ClpB_D2-small
PF13602.1	5	3	3	ADH_zinc_N_2
PF13249.1	5	4	2	Prenyltrans_2
PF00097.20	5	4	3	zf-C3HC4
PF00433.19	5	4	8	Pkinase_C
PF00743.14	5	4	2	FMO-like
PF12311.3	5	4	0	DUF3632
PF00251.15	5	4	1	Glyco_hydro_32N
PF02225.17	5	5	1	PA
PF12756.2	5	5	3	zf-C2H2_2
PF00174.14	5	5	0	Oxidored_molyb
PF01144.18	5	6	0	CoA_trans
PF05686.7	5	8	0	Glyco_transf_90
PF01476.15	5	10	0	LysM
PF08767.6	4	1	1	CRM1_C
PF02731.10	4	1	1	SKIP_SNW
PF10446.4	4	0	0	DUF2457
PF04597.9	4	1	1	Ribophorin_I
PF02475.11	4	1	2	Met_10
PF08549.5	4	1	0	SWI-SNF_Ssr4
PF12588.3	4	0	0	PSDC
PF01028.15	4	1	1	Topoisom_I
PF03124.9	4	1	2	EXS
PF03803.10	4	0	1	Scramblase
PF13360.1	4	1	0	PQQ_2
PF04818.8	4	1	1	CTD_bind
PF00113.17	4	1	5	Enolase_C
PF11861.3	4	1	1	DUF3381
PF02516.9	4	1	1	STT3
PF13180.1	4	1	0	PDZ_2
PF06202.9	4	1	1	GDE_C
PF00233.14	4	1	1	PDEase_I
PF08326.7	4	1	2	ACC_central
PF02291.10	4	1	1	TFIID-31kDa
PF03648.9	4	0	0	Glyco_hydro_67N
PF07488.7	4	0	0	Glyco_hydro_67M
PF07477.7	4	0	0	Glyco_hydro_67C
PF10056.4	4	1	0	DUF2293
PF12298.3	4	1	1	Bot1p
PF04054.10	4	1	1	Not1
PF08321.7	4	0	1	PPP5
PF01087.17	4	1	1	GalP_UDP_transf
PF13254.1	4	0	0	DUF4045
PF06870.7	4	1	1	RNA_pol_I_A49
PF00861.17	4	1	1	Ribosomal_L18p
PF01188.16	4	1	0	MR_MLE
PF02545.9	4	1	1	Maf
PF03453.12	4	1	0	MoeA_N
PF13246.1	4	1	1	Hydrolase_like2
PF00334.14	4	1	1	NDK
PF11882.3	4	1	1	DUF3402
PF09084.6	4	1	4	NMT1
PF05207.8	4	1	2	zf-CSL
PF07039.6	4	1	1	DUF1325
PF08561.5	4	1	1	Ribosomal_L37
PF02867.10	4	1	2	Ribonuc_red_lgC
PF04119.7	4	1	1	HSP9_HSP12
PF10354.4	4	1	1	DUF2431
PF09783.4	4	1	2	Vac_ImportDeg
PF12138.3	4	0	0	Spherulin4
PF10032.4	4	1	1	Pho88
PF01015.13	4	1	2	Ribosomal_S3Ae
PF08125.8	4	1	2	Mannitol_dh_C
PF04068.10	4	1	2	RLI
PF01268.14	4	1	2	FTHFS
PF00262.13	4	1	1	Calreticulin
PF01676.13	4	1	0	Metalloenzyme
PF04869.9	4	1	1	Uso1_p115_head
PF10441.4	4	1	1	Urb2
PF10255.4	4	1	0	Paf67
PF06884.6	4	1	0	DUF1264
PF00871.12	4	1	0	Acetate_kinase
PF12014.3	4	1	0	DUF3506
PF01092.14	4	1	2	Ribosomal_S6e
PF11954.3	4	1	0	DUF3471
PF02919.10	4	1	1	Topoisom_I_N
PF02213.11	4	1	3	GYF
PF07500.9	4	1	2	TFIIS_M
PF07757.8	4	1	1	AdoMet_MTase
PF08226.6	4	1	3	DUF1720
PF09532.5	4	1	2	FDF
PF09637.5	4	1	1	Med18
PF00384.17	4	1	0	Molybdopterin
PF13207.1	4	1	1	AAA_17
PF12325.3	4	0	1	TMF_TATA_bd
PF01157.13	4	1	2	Ribosomal_L21e
PF01159.14	4	1	2	Ribosomal_L6e
PF13136.1	4	0	0	DUF3984
PF01991.13	4	1	1	vATP-synt_E
PF03853.10	4	1	2	YjeF_N
PF08628.7	4	1	1	Nexin_C
PF00656.17	4	1	1	Peptidase_C14
PF00762.14	4	1	1	Ferrochelatase
PF11635.3	4	1	1	Med16
PF13741.1	4	1	1	MRP-S25
PF06046.8	4	1	1	Sec6
PF03715.8	4	1	1	Noc2
PF07065.9	4	1	1	D123
PF07541.7	4	1	1	EIF_2_alpha
PF06101.6	4	1	1	DUF946
PF05764.8	4	1	1	YL1
PF12815.2	4	1	0	CTD
PF04669.8	4	1	1	Polysacc_synt_4
PF06991.6	4	1	0	Prp19_bind
PF08596.5	4	1	2	Lgl_C
PF00162.14	4	1	1	PGK
PF05843.9	4	1	1	Suf
PF10383.4	4	1	0	Clr2
PF09324.5	4	1	1	DUF1981
PF00887.14	4	1	1	ACBP
PF01655.13	4	1	1	Ribosomal_L32e
PF11625.3	4	1	0	DUF3253
PF08601.5	4	1	2	PAP1
PF00290.15	4	1	1	Trp_syntA
PF08315.7	4	1	0	cwf18
PF08583.5	4	1	2	Cmc1
PF05995.7	4	1	0	CDO_I
PF00411.14	4	1	3	Ribosomal_S11
PF02449.10	4	1	0	Glyco_hydro_42
PF02628.10	4	1	1	COX15-CtaA
PF08429.6	4	1	0	PLU-1
PF01783.18	4	1	1	Ribosomal_L32p
PF01283.14	4	1	2	Ribosomal_S26e
PF03205.9	4	0	2	MobB
PF00213.13	4	1	1	OSCP
PF09184.6	4	0	1	PPP4R2
PF11905.3	4	1	0	DUF3425
PF07991.7	4	1	1	IlvN
PF03981.7	4	1	1	Ubiq_cyt_C_chap
PF08069.7	4	1	1	Ribosomal_S13_N
PF01777.13	4	1	2	Ribosomal_L27e
PF04179.7	4	1	1	Init_tRNA_PT
PF14138.1	4	1	1	COX16
PF14420.1	4	1	0	Clr5
PF11779.3	4	1	0	DUF3317
PF08083.6	4	1	1	PROCN
PF04777.8	4	1	2	Evr1_Alr
PF05019.8	4	1	1	Coq4
PF02064.10	4	1	1	MAS20
PF06012.7	4	1	1	DUF908
PF02460.13	4	1	1	Patched
PF09507.5	4	1	0	CDC27
PF01990.12	4	1	1	ATP-synt_F
PF13551.1	4	1	0	HTH_29
PF00044.19	4	1	3	Gp_dh_N
PF02800.15	4	1	3	Gp_dh_C
PF06437.6	4	1	1	ISN1
PF04438.11	4	1	2	zf-HIT
PF04161.8	4	1	1	Arv1
PF00316.15	4	1	1	FBPase
PF07156.9	4	1	0	Prenylcys_lyase
PF00346.14	4	1	0	Complex1_49kDa
PF05091.7	4	1	0	eIF-3_zeta
PF02020.13	4	1	2	W2
PF03224.9	4	1	1	V-ATPase_H_N
PF11816.3	4	1	1	DUF3337
PF13880.1	4	1	1	Acetyltransf_13
PF03537.8	4	1	0	DUF297
PF04791.11	4	1	0	LMBR1
PF04927.7	4	0	0	SMP
PF01251.13	4	1	2	Ribosomal_S7e
PF07522.9	4	1	1	DRMBL
PF08202.6	4	0	1	Mis12_component
PF10343.4	4	1	0	DUF2419
PF01294.13	4	1	2	Ribosomal_L13e
PF00723.16	4	1	1	Glyco_hydro_15
PF01232.18	4	1	2	Mannitol_dh
PF00750.14	4	1	2	tRNA-synt_1d
PF02112.10	4	1	1	PDEase_II
PF01902.12	4	1	1	ATP_bind_4
PF01596.12	4	1	0	Methyltransf_3
PF03813.9	4	1	1	Nrap
PF03067.10	4	0	0	Chitin_bind_3
PF07110.6	4	0	0	EthD
PF13714.1	4	1	0	PEP_mutase
PF05502.8	4	1	0	Dynactin_p62
PF00764.14	4	1	1	Arginosuc_synth
PF08572.5	4	1	1	PRP3
PF03800.9	4	1	1	Nuf2
PF04801.8	4	1	1	Sin_N
PF07780.7	4	1	1	Spb1_C
PF09243.5	4	1	2	Rsm22
PF02270.10	4	1	1	TFIIF_beta
PF00375.13	4	1	0	SDF
PF13371.1	4	1	0	TPR_9
PF08658.5	4	1	1	Rad54_N
PF04841.8	4	1	1	Vps16_N
PF11272.3	4	0	0	DUF3072
PF07718.7	4	1	1	Coatamer_beta_C
PF04209.8	4	1	0	HgmA
PF02540.12	4	2	2	NAD_synthase
PF02141.16	4	2	0	DENN
PF05794.8	4	2	1	Tcp11
PF01434.13	4	2	3	Peptidase_M41
PF01255.14	4	2	2	Prenyltransf
PF05191.9	4	2	2	ADK_lid
PF03134.14	4	2	1	TB2_DP1_HVA22
PF05670.8	4	2	2	DUF814
PF03095.10	4	2	2	PTPA
PF00319.13	4	2	4	SRF-TF
PF13241.1	4	2	1	NAD_binding_7
PF02375.12	4	2	3	JmjN
PF02219.12	4	2	2	MTHFR
PF01417.15	4	2	5	ENTH
PF04366.7	4	2	2	DUF500
PF03731.10	4	2	2	Ku_N
PF02735.11	4	2	2	Ku
PF02982.9	4	2	0	Scytalone_dh
PF12812.2	4	2	2	PDZ_1
PF02881.14	4	2	2	SRP54_N
PF01411.14	4	2	2	tRNA-synt_2c
PF02900.13	4	2	0	LigB
PF00111.22	4	2	1	Fer2
PF04083.11	4	2	3	Abhydro_lipase
PF12895.2	4	2	2	Apc3
PF04893.12	4	2	3	Yip1
PF03619.11	4	2	1	Solute_trans_a
PF04566.8	4	2	2	RNA_pol_Rpb2_4
PF04588.8	4	2	2	HIG_1_N
PF04248.7	4	2	0	DUF427
PF00923.14	4	2	2	Transaldolase
PF02728.11	4	2	0	Cu_amine_oxidN3
PF08159.7	4	2	2	NUC153
PF00314.12	4	2	0	Thaumatin
PF08624.5	4	2	2	CRC_subunit
PF04147.7	4	2	2	Nop14
PF00585.13	4	2	2	Thr_dehydrat_C
PF02847.12	4	2	2	MA3
PF03931.10	4	2	2	Skp1_POZ
PF07534.11	4	2	2	TLD
PF01368.15	4	2	1	DHH
PF00885.14	4	2	1	DMRL_synthase
PF12349.3	4	2	2	Sterol-sensing
PF08518.6	4	2	2	GIT_SHD
PF01193.19	4	2	2	RNA_pol_L
PF01000.21	4	2	2	RNA_pol_A_bac
PF03351.12	4	2	0	DOMON
PF01997.11	4	2	0	Translin
PF01751.17	4	2	2	Toprim
PF01536.11	4	2	1	SAM_decarbox
PF14382.1	4	2	1	ECR1_N
PF00810.13	4	2	1	ER_lumen_recept
PF08643.5	4	2	1	DUF1776
PF08528.6	4	2	2	Whi5
PF00797.12	4	2	0	Acetyltransf_2
PF11969.3	4	2	2	DcpS_C
PF00208.16	4	2	3	ELFV_dehydrog
PF04053.9	4	2	2	Coatomer_WDAD
PF04142.10	4	2	0	Nuc_sug_transp
PF03946.9	4	2	3	Ribosomal_L11_N
PF10996.3	4	2	2	Beta-Casp
PF08801.6	4	2	3	Nucleoporin_N
PF03177.9	4	2	3	Nucleoporin_C
PF13000.2	4	2	2	Acatn
PF01661.16	4	2	1	Macro
PF00466.15	4	2	3	Ribosomal_L10
PF08390.6	4	2	2	TRAM1
PF01873.12	4	2	2	eIF-5_eIF-2B
PF01507.14	4	2	2	PAPS_reduct
PF07745.8	4	2	0	Glyco_hydro_53
PF11717.3	4	2	2	Tudor-knot
PF01172.13	4	2	2	SBDS
PF00245.15	4	2	1	Alk_phosphatase
PF05224.7	4	2	1	NDT80_PhoG
PF00327.15	4	2	4	Ribosomal_L30
PF01151.13	4	2	3	ELO
PF01214.13	4	2	2	CK_II_beta
PF04502.8	4	2	1	DUF572
PF01222.12	4	2	2	ERG4_ERG24
PF04676.9	4	2	1	CwfJ_C_2
PF03167.14	4	2	1	UDG
PF04855.7	4	2	3	SNF5
PF04628.8	4	2	2	Sedlin_N
PF08676.6	4	2	2	MutL_C
PF01746.16	4	2	1	tRNA_m1G_MT
PF06999.7	4	2	2	Suc_Fer-like
PF13185.1	4	2	1	GAF_2
PF03367.8	4	2	2	zf-ZPR1
PF03483.12	4	2	1	B3_4
PF04564.10	4	2	1	U-box
PF01176.14	4	2	1	eIF-1a
PF01974.12	4	2	2	tRNA_int_endo
PF02114.11	4	2	1	Phosducin
PF00573.17	4	2	3	Ribosomal_L4
PF09811.4	4	2	2	Yae1_N
PF05222.10	4	2	1	AlaDh_PNT_N
PF01262.16	4	2	1	AlaDh_PNT_C
PF07393.6	4	2	2	Sec10
PF00232.13	4	2	0	Glyco_hydro_1
PF10513.4	4	2	2	EPL1
PF00977.16	4	2	2	His_biosynth
PF04707.9	4	2	3	PRELI
PF01849.13	4	2	3	NAC
PF03770.11	4	2	2	IPK
PF04670.7	4	2	2	Gtr1_RagA
PF01564.12	4	2	2	Spermine_synth
PF01965.19	4	2	4	DJ-1_PfpI
PF04573.7	4	2	1	SPC22
PF04768.8	4	2	2	DUF619
PF02866.13	4	2	3	Ldh_1_C
PF04410.9	4	2	2	Gar1
PF01035.15	4	2	1	DNA_binding_1
PF08588.5	4	2	0	DUF1769
PF02809.15	4	2	0	UIM
PF04857.15	4	2	1	CAF1
PF04146.10	4	2	1	YTH
PF01509.13	4	2	2	TruB_N
PF13656.1	4	2	2	RNA_pol_L_2
PF00081.17	4	2	1	Sod_Fe_N
PF03463.10	4	2	2	eRF1_1
PF03465.10	4	2	3	eRF1_3
PF02347.11	4	2	2	GDC-P
PF11987.3	4	2	2	IF-2
PF04931.8	4	2	1	DNA_pol_phi
PF01205.14	4	2	2	UPF0029
PF01244.16	4	2	0	Peptidase_M19
PF14260.1	4	2	2	zf-C4pol
PF08156.8	4	2	2	NOP5NT
PF04185.9	4	2	0	Phosphoesterase
PF13535.1	4	2	0	ATP-grasp_4
PF04099.7	4	2	4	Sybindin
PF03097.13	4	2	2	BRO1
PF13949.1	4	2	2	ALIX_LYPXL_bnd
PF11937.3	4	2	0	DUF3455
PF08547.7	4	2	0	CIA30
PF12505.3	4	2	0	DUF3712
PF08148.7	4	2	2	DSHCT
PF10277.4	4	2	2	Frag1
PF13423.1	4	2	1	UCH_1
PF09359.5	4	2	3	VTC
PF02636.12	4	2	1	Methyltransf_28
PF00035.20	4	2	2	dsrm
PF02358.11	4	2	3	Trehalose_PPase
PF13840.1	4	2	1	ACT_7
PF01168.15	4	2	2	Ala_racemase_N
PF01866.12	4	2	3	Diphthamide_syn
PF10405.4	4	2	2	BHD_3
PF13445.1	4	2	2	zf-RING_LisH
PF01756.14	4	2	1	ACOX
PF13671.1	4	2	0	AAA_33
PF02729.16	4	2	2	OTCace_N
PF00185.19	4	2	2	OTCace
PF13347.1	4	2	0	MFS_2
PF07575.8	4	2	1	Nucleopor_Nup85
PF05071.11	4	2	0	NDUFA12
PF00445.13	4	2	1	Ribonuclease_T2
PF04157.11	4	2	2	EAP30
PF01841.14	4	2	0	Transglut_core
PF01321.13	4	2	1	Creatinase_N
PF02880.11	4	2	3	PGM_PMM_III
PF01778.12	4	2	1	Ribosomal_L28e
PF02330.11	4	2	1	MAM33
PF02142.17	4	2	4	MGS
PF10403.4	4	2	2	BHD_1
PF01843.14	4	2	2	DIL
PF00588.14	4	2	2	SpoU_methylase
PF01040.13	4	2	2	UbiA
PF06544.7	4	2	1	DUF1115
PF03291.11	4	2	1	Pox_MCEL
PF07978.8	4	2	0	NIPSNAP
PF08324.6	4	2	1	PUL
PF02678.11	4	2	0	Pirin
PF06220.7	4	2	1	zf-U1
PF01174.14	4	2	3	SNO
PF00393.14	4	2	2	6PGD
PF07969.6	4	2	0	Amidohydro_3
PF01018.17	4	2	2	GTP1_OBG
PF06201.8	4	2	0	PITH
PF00252.13	4	2	2	Ribosomal_L16
PF05922.11	4	2	4	Inhibitor_I9
PF00677.12	4	2	2	Lum_binding
PF00380.14	4	2	3	Ribosomal_S9
PF06733.10	4	2	2	DEAD_2
PF13307.1	4	2	2	Helicase_C_2
PF07950.6	4	2	2	DUF1691
PF04762.7	4	2	1	IKI3
PF02996.12	4	2	3	Prefoldin
PF01702.13	4	2	0	TGT
PF00203.16	4	2	2	Ribosomal_S19
PF12348.3	4	2	1	CLASP_N
PF05422.7	4	2	0	SIN1
PF09784.4	4	2	1	L31
PF05724.6	4	2	0	TPMT
PF05875.7	4	3	2	Ceramidase
PF01713.16	4	3	2	Smr
PF08386.5	4	3	0	Abhydrolase_4
PF01513.16	4	3	3	NAD_kinase
PF01148.15	4	3	3	CTP_transf_1
PF12821.2	4	3	1	DUF3815
PF02861.15	4	3	2	Clp_N
PF02212.13	4	3	2	GED
PF01424.17	4	3	2	R3H
PF03099.14	4	3	3	BPL_LplA_LipB
PF02297.12	4	3	2	COX6B
PF00975.15	4	3	0	Thioesterase
PF03460.12	4	3	2	NIR_SIR_ferr
PF02817.12	4	3	1	E3_binding
PF10397.4	4	3	1	ADSL_C
PF10604.4	4	3	0	Polyketide_cyc2
PF10296.4	4	3	2	DUF2404
PF11309.3	4	3	0	DUF3112
PF02040.10	4	3	0	ArsB
PF01180.16	4	3	1	DHO_dh
PF08244.7	4	3	1	Glyco_hydro_32C
PF02862.12	4	3	2	DDHD
PF00253.16	4	3	3	Ribosomal_S14
PF00011.16	4	3	2	HSP20
PF02301.13	4	3	3	HORMA
PF00717.18	4	3	3	Peptidase_S24
PF11051.3	4	3	6	Mannosyl_trans3
PF13353.1	4	3	0	Fer4_12
PF13452.1	4	3	2	zf-MaoC
PF11930.3	4	3	2	DUF3448
PF03435.13	4	3	1	Saccharop_dh
PF00622.23	4	3	3	SPRY
PF10303.4	4	3	2	DUF2408
PF00860.15	4	4	0	Xan_ur_permease
PF12847.2	4	4	0	Methyltransf_18
PF01735.13	4	4	5	PLA2_B
PF11915.3	4	4	0	DUF3433
PF13640.1	4	4	1	2OG-FeII_Oxy_3
PF00467.24	4	4	9	KOW
PF02737.13	4	4	0	3HCDH_N
PF00725.17	4	4	0	3HCDH
PF11970.3	4	4	1	Git3_C
PF01048.15	4	4	2	PNP_UDP_1
PF05572.8	4	5	0	Peptidase_M43
PF02902.14	4	5	2	Peptidase_C48
PF11710.3	4	5	1	Git3
PF00854.16	4	5	1	PTR2
PF03959.8	4	9	3	FSH1
PF02801.17	4	14	2	Ketoacyl-synt_C
PF04922.7	3	1	1	DIE2_ALG10
PF04050.9	3	1	1	Upf2
PF12465.3	3	1	1	Pr_beta_C
PF08610.5	3	1	0	Pex16
PF04263.11	3	1	1	TPK_catalytic
PF04265.9	3	1	1	TPK_B1_binding
PF00268.16	3	1	2	Ribonuc_red_sm
PF11968.3	3	1	1	DUF3321
PF01341.12	3	0	0	Glyco_hydro_6
PF00479.17	3	1	1	G6PD_N
PF09810.4	3	1	2	Morph_protein1
PF13579.1	3	1	0	Glyco_trans_4_4
PF06424.7	3	1	1	PRP1_N
PF12619.3	3	1	1	MCM2_N
PF00187.14	3	0	0	Chitin_bind_1
PF02978.14	3	1	1	SRP_SPB
PF06148.6	3	1	1	COG2
PF13015.1	3	1	2	PRKCSH_1
PF09368.5	3	1	1	Sas10_Utp3_C
PF13300.1	3	1	0	DUF4078
PF08538.5	3	1	0	DUF1749
PF03630.9	3	1	1	Fumble
PF12767.2	3	0	1	SAGA-Tad1
PF04189.8	3	1	1	Gcd10p
PF10329.4	3	1	1	DUF2417
PF10290.4	3	1	2	DUF2403
PF10287.4	3	1	2	DUF2401
PF09335.6	3	1	1	SNARE_assoc
PF08557.5	3	1	0	Lipid_DES
PF02102.10	3	1	0	Peptidase_M35
PF02036.12	3	1	0	SCP2
PF03661.8	3	1	1	UPF0121
PF13883.1	3	1	0	Pyrid_oxidase_2
PF11919.3	3	1	1	DUF3437
PF06229.7	3	1	0	FRG1
PF05221.12	3	1	1	AdoHcyase
PF02891.15	3	1	3	zf-MIZ
PF00742.14	3	1	1	Homoserine_dh
PF01731.15	3	0	0	Arylesterase
PF12768.2	3	1	1	Rax2
PF04005.7	3	1	1	Hus1
PF08229.6	3	1	1	SHR3_chaperone
PF03381.10	3	1	3	CDC50
PF03917.12	3	1	1	GSH_synth_ATP
PF03199.10	3	1	1	GSH_synthase
PF00877.14	3	0	0	NLPC_P60
PF08591.5	3	0	1	RNR_inhib
PF07983.8	3	1	2	X8
PF05390.6	3	1	2	KRE9
PF11709.3	3	1	1	Mit_ribos_Mrp51
PF01165.15	3	1	1	Ribosomal_S21
PF08507.5	3	1	1	COPI_assoc
PF01687.12	3	1	1	Flavokinase
PF10058.4	3	1	1	DUF2296
PF03850.9	3	1	1	Tfb4
PF08622.5	3	1	3	Svf1
PF06108.7	3	1	0	DUF952
PF13826.1	3	1	0	DUF4188
PF13964.1	3	0	2	Kelch_6
PF00436.20	3	0	1	SSB
PF03733.8	3	1	1	DUF307
PF06415.8	3	1	0	iPGM_N
PF08433.5	3	1	1	KTI12
PF03162.8	3	1	5	Y_phosphatase2
PF07955.6	3	1	1	DUF1687
PF04729.8	3	1	1	ASF1_hist_chap
PF00368.13	3	1	2	HMG-CoA_red
PF13933.1	3	1	1	HRXXH
PF04305.9	3	0	0	DUF455
PF11221.3	3	1	1	Med21
PF05631.9	3	1	0	DUF791
PF01496.14	3	1	2	V_ATPase_I
PF08123.8	3	1	1	DOT1
PF01208.12	3	1	1	URO-D
PF01257.14	3	1	0	Complex1_24kDa
PF05705.9	3	1	0	DUF829
PF01115.12	3	1	1	F_actin_cap_B
PF01154.12	3	1	1	HMG_CoA_synt_N
PF10180.4	3	1	1	DUF2373
PF01016.14	3	1	1	Ribosomal_L27
PF08752.5	3	1	1	Gamma-COP
PF04889.7	3	1	1	Cwf_Cwc_15
PF04614.7	3	1	1	Pex19
PF03656.8	3	1	1	Pam16
PF09419.5	3	1	1	PGP_phosphatase
PF01774.12	3	1	0	UreD
PF13504.1	3	1	0	LRR_7
PF05768.9	3	1	1	DUF836
PF01780.14	3	1	2	Ribosomal_L37ae
PF00343.15	3	1	1	Phosphorylase
PF11789.3	3	0	2	zf-Nse
PF05406.10	3	1	0	WGR
PF02877.9	3	1	0	PARP_reg
PF14308.1	3	1	2	DnaJ-X
PF07304.6	3	1	1	SRA1
PF04188.8	3	1	1	Mannosyl_trans2
PF04898.9	3	1	1	Glu_syn_central
PF01645.12	3	1	1	Glu_synthase
PF01493.14	3	1	1	GXGXG
PF03587.9	3	1	1	EMG1
PF01264.16	3	1	1	Chorismate_synt
PF04078.8	3	1	1	Rcd1
PF08733.5	3	1	2	PalH
PF01981.11	3	1	1	PTH2
PF04847.7	3	1	1	Calcipressin
PF08634.5	3	1	1	Pet127
PF03985.8	3	1	1	Paf1
PF10443.4	3	1	1	RNA12
PF00931.17	3	1	0	NB-ARC
PF01282.14	3	1	2	Ribosomal_S24e
PF03576.9	3	0	0	Peptidase_S58
PF03690.8	3	1	1	UPF0160
PF00831.18	3	1	2	Ribosomal_L29
PF00833.13	3	1	2	Ribosomal_S17e
PF04129.7	3	1	1	Vps52
PF14234.1	3	1	0	DUF4336
PF02150.11	3	1	3	RNA_POL_M_15KD
PF01709.15	3	1	1	Transcrip_reg
PF05508.6	3	1	1	Ran-binding
PF01142.13	3	1	1	TruD
PF12922.2	3	1	1	Cnd1_N
PF12717.2	3	1	1	Cnd1
PF09801.4	3	1	1	SYS1
PF07986.7	3	1	0	TBCC
PF13519.1	3	1	1	VWA_2
PF01650.13	3	1	1	Peptidase_C13
PF12066.3	3	1	0	DUF3546
PF04959.8	3	1	0	ARS2
PF10252.4	3	1	0	PP28
PF13945.1	3	0	1	NST1
PF03343.8	3	1	2	SART-1
PF00218.16	3	1	1	IGPS
PF09341.5	3	1	1	Pcc1
PF04979.9	3	1	1	IPP-2
PF09430.5	3	1	0	DUF2012
PF02689.9	3	0	0	Herpes_Helicase
PF00344.15	3	1	2	SecY
PF00827.12	3	1	2	Ribosomal_L15e
PF03081.10	3	1	1	Exo70
PF02364.10	3	1	3	Glucan_synthase
PF08651.5	3	1	1	DASH_Duo1
PF06807.9	3	1	2	Clp1
PF07946.9	3	1	1	DUF1682
PF09446.5	3	1	1	VMA21
PF11262.3	3	0	1	Tho2
PF01566.13	3	1	3	Nramp
PF10494.4	3	1	0	Stk19
PF08217.6	3	1	1	DUF1712
PF04499.10	3	1	4	SAPS
PF12400.3	3	1	1	DUF3661
PF10236.4	3	1	1	DAP3
PF01907.14	3	1	2	Ribosomal_L37e
PF01937.14	3	1	1	DUF89
PF04121.8	3	1	1	Nup84_Nup100
PF04802.10	3	1	1	SMK-1
PF13259.1	3	1	1	DUF4050
PF05187.8	3	1	1	ETF_QO
PF02812.13	3	1	2	ELFV_dehydrog_N
PF01833.19	3	0	2	TIG
PF05327.6	3	1	1	RRN3
PF08718.6	3	1	0	GLTP
PF11443.3	3	0	0	DUF2828
PF09445.5	3	1	1	Methyltransf_15
PF01220.14	3	1	0	DHquinase_II
PF13476.1	3	1	2	AAA_23
PF09258.5	3	1	0	Glyco_transf_64
PF13234.1	3	1	2	rRNA_proc-arch
PF04667.12	3	1	2	Endosulfine
PF12722.2	3	1	1	Hid1
PF05691.7	3	1	0	Raffinose_syn
PF01267.12	3	1	1	F-actin_cap_A
PF00490.16	3	1	1	ALAD
PF03987.10	3	1	2	Autophagy_act_C
PF01062.16	3	1	0	Bestrophin
PF01200.13	3	1	2	Ribosomal_S28e
PF13616.1	3	0	0	Rotamase_3
PF03069.10	3	1	0	FmdA_AmdA
PF12230.3	3	1	1	PRP21_like_P
PF02936.9	3	1	3	COX4
PF12761.2	3	1	2	End3
PF14306.1	3	1	1	PUA_2
PF01747.12	3	1	1	ATP-sulfurylase
PF03870.10	3	1	1	RNA_pol_Rpb8
PF10510.4	3	1	1	PIG-S
PF02567.11	3	1	1	PhzC-PhzF
PF01992.11	3	1	1	vATP-synt_AC39
PF10998.3	3	1	1	DUF2838
PF08446.6	3	1	0	PAS_2
PF08567.6	3	1	1	TFIIH_BTF_p62_N
PF02792.9	3	1	0	Mago_nashi
PF01074.17	3	1	1	Glyco_hydro_38
PF07061.6	3	1	1	Swi5
PF10597.4	3	1	1	U5_2-snRNA_bdg
PF10596.4	3	1	1	U6-snRNA_bdg
PF12134.3	3	1	1	PRP8_domainIV
PF12449.3	3	1	0	DUF3684
PF09439.5	3	1	1	SRPRB
PF10496.4	3	0	1	Syntaxin-18_N
PF06984.8	3	1	1	MRP-L47
PF04190.8	3	1	1	DUF410
PF04061.9	3	1	2	ORMDL
PF02450.10	3	1	2	LACT
PF04140.9	3	1	1	ICMT
PF10104.4	3	1	2	Brr6_like_C_C
PF02806.13	3	1	1	Alpha-amylase_C
PF10310.4	3	1	1	DUF2413
PF05180.7	3	1	1	zf-DNL
PF03074.11	3	1	1	GCS
PF10392.4	3	1	1	COG5
PF04133.9	3	1	1	Vps55
PF10345.4	3	1	1	Cohesin_load
PF09763.4	3	1	1	Sec3
PF05026.8	3	1	1	DCP2
PF08311.7	3	1	2	Mad3_BUB1_I
PF05625.6	3	1	1	PAXNEB
PF08514.6	3	1	1	STAG
PF08701.6	3	1	1	GN3L_Grn1
PF11708.3	3	1	1	Slu7
PF12838.2	3	1	0	Fer4_7
PF03164.9	3	1	1	Mon1
PF02747.10	3	1	1	PCNA_C
PF03635.12	3	1	1	Vps35
PF09793.4	3	1	1	AD
PF00438.15	3	1	2	S-AdoMet_synt_N
PF05856.7	3	1	1	ARPC4
PF08432.5	3	1	1	DUF1742
PF10483.4	3	1	1	Hap2_elong
PF01619.13	3	1	1	Pro_dh
PF13932.1	3	1	1	GIDA_assoc_3
PF03657.8	3	1	1	UPF0113
PF07540.6	3	1	1	NOC3p
PF04992.9	3	1	1	RNA_pol_Rpb1_6
PF02676.9	3	1	1	TYW3
PF07743.8	3	1	1	HSCB_C
PF04062.9	3	1	1	P21-Arc
PF07080.6	3	0	0	DUF1348
PF11489.3	3	1	2	DUF3210
PF12816.2	3	1	1	Vps8
PF01454.14	3	1	1	MAGE
PF09295.5	3	1	6	ChAPs
PF12780.2	3	1	1	AAA_8
PF04100.7	3	1	1	Vps53_N
PF06963.7	3	1	0	FPN1
PF00177.16	3	2	2	Ribosomal_S7
PF12766.2	3	2	1	Pyridox_oxase_2
PF08669.6	3	2	1	GCV_T_C
PF08590.5	3	2	1	DUF1771
PF06500.6	3	2	0	DUF1100
PF00163.14	3	2	3	Ribosomal_S4
PF10334.4	3	2	1	DUF2421
PF08662.6	3	2	3	eIF2A
PF13537.1	3	2	3	GATase_7
PF08799.6	3	2	0	PRP4
PF08797.6	3	2	1	HIRAN
PF13238.1	3	2	3	AAA_18
PF00788.18	3	2	2	RA
PF01521.15	3	2	3	Fe-S_biosyn
PF14033.1	3	2	0	DUF4246
PF00238.14	3	2	3	Ribosomal_L14
PF12265.3	3	2	3	CAF1C_H4-bd
PF00276.15	3	2	2	Ribosomal_L23
PF13232.1	3	2	0	Complex1_LYR_1
PF10367.4	3	2	2	Vps39_2
PF03650.8	3	2	3	UPF0041
PF01169.14	3	2	2	UPF0016
PF01633.15	3	2	2	Choline_kinase
PF03226.9	3	2	1	Yippee
PF08657.5	3	2	1	DASH_Spc34
PF00763.18	3	2	3	THF_DHG_CYH
PF02882.14	3	2	3	THF_DHG_CYH_C
PF01127.17	3	2	2	Sdh_cyt
PF00120.19	3	2	1	Gln-synt_C
PF12855.2	3	2	1	Ecl1
PF03737.10	3	2	1	Methyltransf_6
PF13391.1	3	2	0	HNH_2
PF00366.15	3	2	3	Ribosomal_S17
PF01027.15	3	2	1	Bax1-I
PF10404.4	3	2	2	BHD_2
PF00056.18	3	2	3	Ldh_1_N
PF02441.14	3	2	4	Flavoprotein
PF01134.17	3	2	1	GIDA
PF00390.14	3	2	1	malic
PF00338.17	3	2	2	Ribosomal_S10
PF13832.1	3	3	2	zf-HC5HC2H_2
PF11578.3	3	3	0	DUF3237
PF07676.7	3	3	0	PD40
PF13911.1	3	3	0	AhpC-TSA_2
PF05903.9	3	3	0	DUF862
PF03807.12	3	3	1	F420_oxidored
PF03721.9	3	3	0	UDPG_MGDP_dh_N
PF06747.8	3	4	4	CHCH
PF04303.8	3	4	0	PrpF
PF03572.13	3	5	0	Peptidase_S41
PF13847.1	3	5	3	Methyltransf_31
PF06766.6	3	5	0	Hydrophobin_2
PF03456.13	2	1	0	uDENN
PF03455.14	2	1	0	dDENN
PF04615.8	2	1	1	Utp14
PF09809.4	2	1	1	MRP-L27
PF02569.10	2	1	1	Pantoate_ligase
PF04006.7	2	1	1	Mpp10
PF04088.8	2	1	1	Peroxin-13_N
PF08285.6	2	1	0	DPM3
PF12152.3	2	1	2	eIF_4G1
PF10406.4	2	1	1	TAF8_C
PF11093.3	2	1	1	Mitochondr_Som1
PF07103.6	2	1	0	DUF1365
PF04227.7	2	1	0	Indigoidine_A
PF07539.7	2	1	1	DRIM
PF05630.6	2	1	0	NPP1
PF12473.3	2	1	0	DUF3694
PF09382.5	2	1	1	RQC
PF05873.7	2	1	1	Mt_ATP-synt_D
PF03223.10	2	1	1	V-ATPase_C
PF03051.10	2	1	1	Peptidase_C1_2
PF09364.5	2	1	0	XFP_N
PF03894.10	2	1	0	XFP
PF09363.5	2	1	0	XFP_C
PF05833.6	2	1	1	FbpA
PF11923.3	2	1	1	DUF3441
PF12765.2	2	1	1	Cohesin_HEAT
PF12830.2	2	1	1	Nipped-B_C
PF10333.4	2	0	1	Pga1
PF09135.6	2	1	2	Alb1
PF07985.7	2	0	1	SRR1
PF04096.9	2	1	3	Nucleoporin2
PF12110.3	2	1	1	Nup96
PF13361.1	2	1	2	UvrD_C
PF14370.1	2	1	1	Topo_C_assoc
PF12009.3	2	0	1	Telomerase_RBD
PF13669.1	2	0	0	Glyoxalase_4
PF08294.6	2	0	1	TIM21
PF06863.7	2	0	0	DUF1254
PF06742.6	2	1	0	DUF1214
PF09329.6	2	1	1	zf-primase
PF09468.5	2	1	1	RNase_H2-Ydr279
PF08457.5	2	0	1	Sfi1
PF06244.7	2	1	0	DUF1014
PF13324.1	2	1	1	GCIP
PF12157.3	2	1	1	DUF3591
PF03643.10	2	1	1	Vps26
PF02152.13	2	1	2	FolB
PF12331.3	2	1	0	DUF3636
PF04699.9	2	1	1	P16-Arc
PF12735.2	2	0	1	Trs65
PF03730.9	2	1	2	Ku_C
PF12745.2	2	1	1	HGTP_anticodon2
PF05181.7	2	0	1	XPA_C
PF10291.4	2	1	1	muHD
PF05557.8	2	1	1	MAD
PF10159.4	2	1	0	MMtag
PF00926.14	2	1	1	DHBP_synthase
PF01086.12	2	1	1	Clathrin_lg_ch
PF09280.6	2	1	1	XPC-binding
PF00855.12	2	1	2	PWWP
PF00832.15	2	1	1	Ribosomal_L39
PF01209.13	2	1	1	Ubie_methyltran
PF05348.6	2	1	1	UMP1
PF13881.1	2	1	0	Rad60-SLD_2
PF12971.2	2	0	0	NAGLU_N
PF02602.10	2	1	1	HEM4
PF05615.8	2	1	1	THOC7
PF13365.1	2	1	1	Trypsin_2
PF12894.2	2	0	1	Apc4_WD40
PF12896.2	2	0	1	Apc4
PF07890.7	2	1	1	Rrp15p
PF08660.6	2	1	1	Alg14
PF09779.4	2	1	0	DUF2349
PF03666.8	2	0	1	NPR3
PF09110.6	2	1	2	HAND
PF09350.5	2	1	0	DUF1992
PF08519.7	2	1	1	RFC1
PF07915.8	2	1	1	PRKCSH
PF12928.2	2	1	1	tRNA_int_end_N2
PF06911.7	2	1	0	Senescence
PF12657.2	2	0	0	TFIIIC_delta
PF12660.2	2	0	1	zf-TFIIIC
PF13688.1	2	1	0	Peptidase_M84
PF00200.18	2	1	0	Disintegrin
PF10615.4	2	1	0	DUF2470
PF02187.12	2	0	0	GAS2
PF08520.5	2	1	2	DUF1748
PF02272.14	2	0	1	DHHA1
PF09816.4	2	1	0	EAF
PF10544.4	2	0	0	T5orf172
PF01799.15	2	1	0	Fer2_2
PF00941.16	2	1	0	FAD_binding_5
PF03450.12	2	1	0	CO_deh_flav_C
PF01315.17	2	1	0	Ald_Xan_dh_C
PF02738.13	2	1	0	Ald_Xan_dh_C2
PF02615.9	2	1	0	Ldh_2
PF12998.2	2	1	2	ING
PF04106.7	2	1	1	APG5
PF12513.3	2	1	1	SUV3_C
PF00800.13	2	1	1	PDT
PF02109.11	2	1	1	DAD
PF08523.5	2	1	1	MBF1
PF06480.10	2	1	2	FtsH_ext
PF10203.4	2	1	1	Pet191_N
PF10360.4	2	1	0	DUF2433
PF09441.5	2	1	0	Abp2
PF13563.1	2	1	0	2_5_RNA_ligase2
PF06017.8	2	1	2	Myosin_TH1
PF08982.6	2	1	0	DUF1857
PF06775.9	2	1	0	Seipin
PF02744.12	2	1	1	GalP_UDP_tr_C
PF11711.3	2	1	1	Tim54
PF06419.6	2	1	1	COG6
PF10176.4	2	1	1	DUF2370
PF14204.1	2	1	1	Ribosomal_L18_c
PF04758.9	2	1	2	Ribosomal_S30
PF07904.8	2	1	1	Eaf7
PF12341.3	2	1	1	DUF3639
PF04734.8	2	1	0	Ceramidase_alk
PF12824.2	2	1	1	MRP-L20
PF05700.6	2	1	0	BCAS2
PF07855.7	2	1	0	DUF1649
PF08314.6	2	1	1	Sec39
PF08510.7	2	1	1	PIG-P
PF03660.9	2	1	1	PHF5
PF08418.5	2	1	1	Pol_alpha_B_N
PF06331.7	2	0	1	Tbf5
PF09384.5	2	1	1	UTP15_C
PF10645.4	2	1	0	Carb_bind
PF08490.7	2	1	1	DUF1744
PF12597.3	2	1	1	DUF3767
PF03531.9	2	1	2	SSrecog
PF04577.9	2	0	0	DUF563
PF03477.11	2	1	2	ATP-cone
PF01855.14	2	1	0	POR_N
PF04571.9	2	1	1	Lipin_N
PF08235.8	2	1	1	LNS2
PF08193.6	2	1	0	INO80_Ies4
PF01781.13	2	1	1	Ribosomal_L38e
PF11785.3	2	1	1	Aft1_OSA
PF11786.3	2	1	0	Aft1_HRA
PF11787.3	2	1	0	Aft1_HRR
PF05336.8	2	1	0	DUF718
PF02751.9	2	1	1	TFIIA_gamma_C
PF01900.14	2	1	1	RNase_P_Rpp14
PF14342.1	2	0	0	DUF4396
PF08286.6	2	1	1	Spc24
PF05719.6	2	1	1	GPP34
PF08045.6	2	1	0	CDC14
PF02840.10	2	1	1	Prp18
PF08621.5	2	1	1	RPAP1_N
PF08620.5	2	1	1	RPAP1_C
PF04176.8	2	1	1	TIP41
PF06052.7	2	1	1	3-HAO
PF01922.12	2	1	1	SRP19
PF04258.8	2	1	1	Peptidase_A22B
PF01674.13	2	0	0	Lipase_2
PF03416.14	2	1	1	Peptidase_C54
PF08568.5	2	1	2	Kinetochor_Ybp2
PF11894.3	2	1	1	DUF3414
PF13593.1	2	1	2	DUF4137
PF11640.3	2	1	1	TAN
PF12752.2	2	0	0	SUZ
PF10937.3	2	1	1	DUF2638
PF01233.14	2	1	1	NMT
PF02799.10	2	1	1	NMT_C
PF03311.9	2	1	2	Cornichon
PF09202.6	2	1	1	Rio2_N
PF06367.11	2	1	1	Drf_FH3
PF12754.2	2	1	0	Blt1
PF09248.5	2	0	0	DUF1965
PF03454.10	2	1	0	MoeA_C
PF09924.4	2	1	0	DUF2156
PF00034.16	2	1	2	Cytochrom_C
PF07297.7	2	1	1	DPM2
PF12861.2	2	1	1	zf-Apc11
PF13867.1	2	0	1	SAP30_Sin3_bdg
PF01466.14	2	1	1	Skp1
PF01725.11	2	1	1	Ham1p_like
PF03133.10	2	1	1	TTL
PF10022.4	2	1	0	DUF2264
PF08502.5	2	1	2	LeuA_dimer
PF00037.22	2	0	1	Fer4
PF08698.6	2	0	1	Fcf2
PF10280.4	2	1	1	Med11
PF01502.13	2	1	1	PRA-CH
PF01503.12	2	1	1	PRA-PH
PF09745.4	2	1	0	DUF2040
PF12572.3	2	1	0	DUF3752
PF10033.4	2	1	1	ATG13
PF07544.8	2	1	1	Med9
PF08147.7	2	1	1	DBP10CT
PF04261.7	2	0	0	Dyp_perox
PF11176.3	2	1	1	DUF2962
PF00329.14	2	1	0	Complex1_30kDa
PF05020.10	2	1	1	zf-NPL4
PF05021.10	2	1	1	NPL4
PF09802.4	2	1	1	Sec66
PF01245.15	2	1	1	Ribosomal_L19
PF01229.12	2	0	0	Glyco_hydro_39
PF04934.9	2	1	1	Med6
PF05002.10	2	1	1	SGS
PF02833.9	2	1	1	DHHA2
PF07910.8	2	1	0	Peptidase_C78
PF10075.4	2	1	0	PCI_Csn8
PF08354.5	2	1	1	DUF1729
PF09794.4	2	1	1	Avl9
PF11764.3	2	1	1	N-SET
PF01940.11	2	1	0	DUF92
PF13323.1	2	1	2	HPIH
PF00759.14	2	0	0	Glyco_hydro_9
PF00235.14	2	1	1	Profilin
PF11960.3	2	0	0	DUF3474
PF11899.3	2	1	0	DUF3419
PF03248.8	2	1	1	Rer1
PF08145.7	2	1	1	BOP1NT
PF03834.9	2	1	1	Rad10
PF12328.3	2	1	1	Rpp20
PF04281.8	2	1	1	Tom22
PF01627.18	2	1	1	Hpt
PF13385.1	2	1	0	Laminin_G_3
PF13578.1	2	0	0	Methyltransf_24
PF08653.5	2	0	1	DASH_Dam1
PF05603.7	2	1	1	DUF775
PF00166.16	2	1	1	Cpn10
PF05958.6	2	1	1	tRNA_U5-meth_tr
PF03467.10	2	0	1	Smg4_UPF3
PF03227.11	2	1	0	GILT
PF00204.20	2	1	1	DNA_gyraseB
PF00521.15	2	1	1	DNA_topoisoIV
PF12146.3	2	0	0	Hydrolase_4
PF06093.8	2	1	1	Spt4
PF08925.6	2	1	0	DUF1907
PF04727.8	2	1	0	ELMO_CED12
PF04908.10	2	1	0	SH3BGR
PF00186.14	2	1	1	DHFR_1
PF07047.7	2	1	0	OPA3
PF06280.7	2	0	0	DUF1034
PF05669.7	2	1	1	Med31
PF01084.15	2	1	1	Ribosomal_S18
PF01058.17	2	1	0	Oxidored_q6
PF08351.6	2	1	1	DUF1726
PF05127.9	2	1	1	Helicase_RecD
PF13718.1	2	1	1	GNAT_acetyltr_2
PF13725.1	2	1	1	tRNA_bind_2
PF04468.7	2	1	2	PSP1
PF01576.14	2	0	0	Myosin_tail_1
PF02115.12	2	1	1	Rho_GDI
PF04032.11	2	1	2	Rpr2
[truncated: 1,731 more rows]
